# Supplementary material
Source: bioRxiv or medRxiv preprint supplement (https://medrxiv.org/highwire/filestream/74699/field_highwire_adjunct_files/0/2020.03.28.20043059-1.pdf)
Supplement: Supplementary file [file 2020.03.28.20043059-1.pdf]

## **Supplementary Appendix**

**This appendix has been provided by the authors to give readers additional information about their work.**

**Supplement Table 1: Demographics and clinical symptoms of patient infected HCov2019**

| Imported cases |        |                       |                     |                                 |                                |
|----------------|--------|-----------------------|---------------------|---------------------------------|--------------------------------|
| Patient        | Gender | Date of illness onset | Exposure period (d) | Clinical symptoms               | Underlying disease             |
| Case 1         | F      | 18 Jan. 2020          | 1                   | Cough                           | No                             |
| Case 2         | M      | 24 Jan. 2020          | 6                   | Fever                           | No                             |
| Case 3         | M      | 24 Jan. 2020          | 6                   | Fever, cough, weakness, myalgia | Hypertension                   |
| Case 4         | F      | 21 Jan. 2020          | 3                   | Fever                           | No                             |
| Case 10        | F      | 3 Feb. 2020           | Not clear           | Fever, cough, pharyngalgia      | Hypertension, cataract surgery |
| Case 18        | F      | 26 Jan. 2020          | 5                   | Fever                           | No                             |
| Case 17        | M      | 14 Jan. 2020          | 10                  | Pharyngalgia                    | Hyperthyroidism                |
| Case 21        | F      | 20 Jan. 2020          | 3                   | Fever, weakness, myalgia        | Diabetes                       |
| Case 20        | M      | Not clear             | Not clear           | Fever, weakness, cough          | Aids, hepatitis B              |
| Case 22        | M      | 9 Jan. 2020           | 6                   | Fever, cough, chest distress,   |                                |

---

asthmatic, myalgia, pharyngalgia

---

**Secondary cases**

---

| Patient | Gender | Date of symptom onset | Exposure period (d) | Clinical symptoms                                         | Underlying disease             |
|---------|--------|-----------------------|---------------------|-----------------------------------------------------------|--------------------------------|
| Case 2  | M      | 24 Jan. 2020          | 6                   | Fever                                                     | No                             |
| Case 3  | M      | 24 Jan. 2020          | 6                   | Fever, cough, weakness, myalgia                           | Hypertension                   |
| Case 5  | F      | 1 Feb. 2020           | none                | Low fever, pharyngalgia                                   | No                             |
| Case 6  | F      | 8 Feb. 2020           | Not clear           | Low fever, chest distress,<br>asthmatic, weakness, chilly | Arthritis, fracture, asthmatic |
| Case 7  | M      | 31 Jan. 2020          | Not clear           | Fever, weakness, dry cough, poor<br>appetite              | gallstone                      |
| Case 8  | F      | 2 Feb. 2020           | 17                  | Fever, weakness, headache,<br>myalgia, diarrhoea          | Caesarean section              |
| Case 11 | F      | 9 Feb. 2020           | none                | Cough, pharyngalgia, asthmatic,                           | Hypertension, cerebrovascular  |

---

---

|         |   |              |           |                                                                            |                                              |
|---------|---|--------------|-----------|----------------------------------------------------------------------------|----------------------------------------------|
|         |   |              |           | weakness, chilly, nausea,                                                  | disease, coronary heart disease              |
| Case 9  | F | 3 Feb. 2020  | 6         | Fever, poor appetite, dry cough                                            | Hypertension, caesarean section              |
| Case 12 | F | 27 Jan. 2020 | 7         | Fever, cough, myalgia                                                      | Hypertension, diabetes                       |
| Case 13 | M | 28 Jan. 2020 | no        | Fever, cough                                                               | Gallstone                                    |
| Case 14 | M | 29 Jan. 2020 | 10        | Fever, cough                                                               | No                                           |
| Case 15 | F | 25 Jan. 2020 | Not clear | Fever, weakness, headache,<br>cough, shortness of breath,<br>expectoration | Caesarean section, cervical<br>spondylopathy |
| Case 16 | M | 27 Jan. 2020 | no        | Fever                                                                      | No                                           |
| Case 19 | M | 27 Jan. 2020 | 7         | Fever, headache, cough                                                     | Hypertension                                 |
| Case 23 | M | 23 Jan. 2020 | Not clear | Fever, weakness, myalgia                                                   | No                                           |

---

Sequential samples (nasal-throat mixed swabs, plasma, urine, and feces) were collected from case 1 to case 11.

Two cases with severe diseases were colored in red.

Case 1, case 2 and case 3 are family cluster, all of them visited Wuhan on Jan.18 and back to Beijing on Jan. 23, 2020. Case 1 firstly appeared syndromes after he arrived at Wuhan. Six days later case 2 and case 3 appeared syndromes in Beijing. So case 2 and case 3 potentially infected after the exposure in Wuhan or infected by case 1 via close contact. Case 12 and case 19 are also family cluster.
